# Supplementary material for: Usnic Acid Potassium Salt: Evaluation of the Acute Toxicity and Antinociceptive Effect in Murine Model
Source: MDPI journal article supplement (doi:10.3390/molecules24112042), 2019-05-28
Supplement: s1 [file s1]

## Supplementary Files

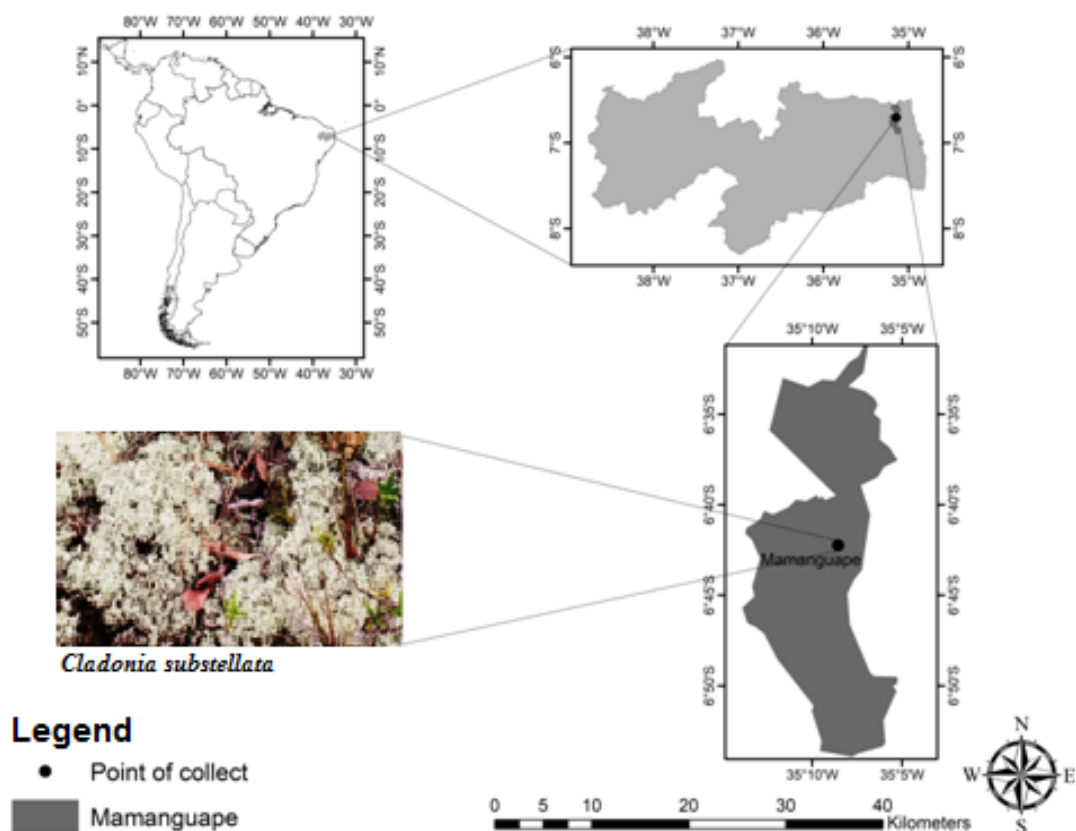

**Figure 1.** Map of Mamanguape (State of Paraíba - Brazil), showing the occurrence area of lichens.

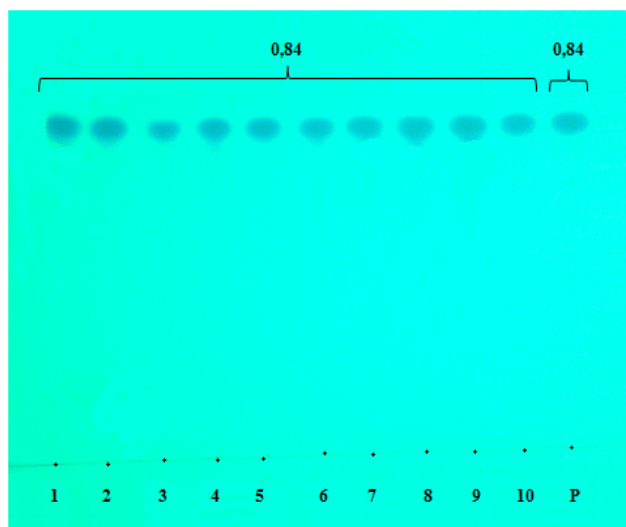

**Figure 2.** Thin Layer Chromatography (TLC) indicating the presence of a single band under ultraviolet light (254 nm) of the purified samples (points 1-10) compared to the standard sample (P) of Merck's usnic acid.

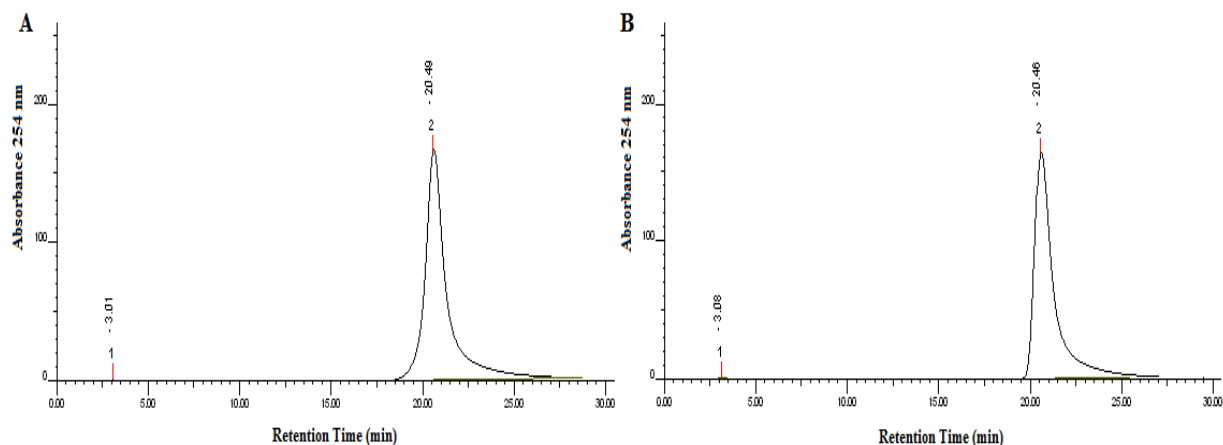

**Figure 3.** High Performance Liquid Chromatogram (HPLC). A, Standard of Merk RT-20.49 (A) - (99.8% purity) and purified usnic acid from *C. substellata* RT-20.46 (B) - (99.6% purity).

### Chemical Analysis of Usnic Acid (UA) and Usnic Acid Potassium Salt (PS-UA)

Confirmation of the structure of UA was performed by proton nuclear magnetic resonance ( $^1\text{H}$ -NMR), Carbon ( $^{13}\text{C}$ -NMR) and Infrared (IR) spectra. The data are described as follows:  $^1\text{H}$ -NMR: (400 MHz, acetone- $d_6$ )  $\delta_{\text{H}}$  (H; *mult.*; int.): 1.76 (3H; s,  $\text{CH}_3$ -13), 2.15 (3H; s,  $\text{CH}_3$ -16), 2.66 (3H; s,  $\text{CH}_3$ -15), 2.68 (3H; s,  $\text{CH}_3$ -18), 5.98 (1H; s, C-4-H), 11.02 (1H; s, C-10-OH), 13.31 (1H; s, C-8-OH), and 18.85 (1H; s, C-3-OH);  $^{13}\text{C}$ -NMR: (400 MHz, acetone- $d_6$ )  $\delta_{\text{C}}$  (C; *mult.*; int.): C-1: 198.05, C-2: 191.70, C-3: 157.50, C-4: 98.32, C-5: 101.53, C-6: 76.99, C-7: 155.20, C-8: 163.89, C-9: 103.94, C-10: 179.38, C-11: 109.34, C-12: 59.06, C-13: 27.87, C-14: 200.30, C-15: 32.10, C-16: 7.52, C-17: 201.76 and C-18: 31.25; and IR (KBr): 3090 ( $\nu$  C-H Ar), 3005 ( $\nu_{\text{as}}$   $\text{CH}_3$ ), 2925 ( $\nu$   $\text{CH}_3$ ), 1695 ( $\nu$  C=O), 1635, 1550 ( $\nu$  C=C Ar), 1446 ( $\delta_{\text{as}}$   $\text{CH}_3$ ) and 1385 ( $\delta_{\text{s}}$   $\text{CH}_3$ )  $\text{cm}^{-1}$ .

Confirmation of the structure of PS-UA was performed by  $^1\text{H}$ -NMR (Figure 4), IR (Figure 5) and C H elemental analysis, from which the following data were obtained.

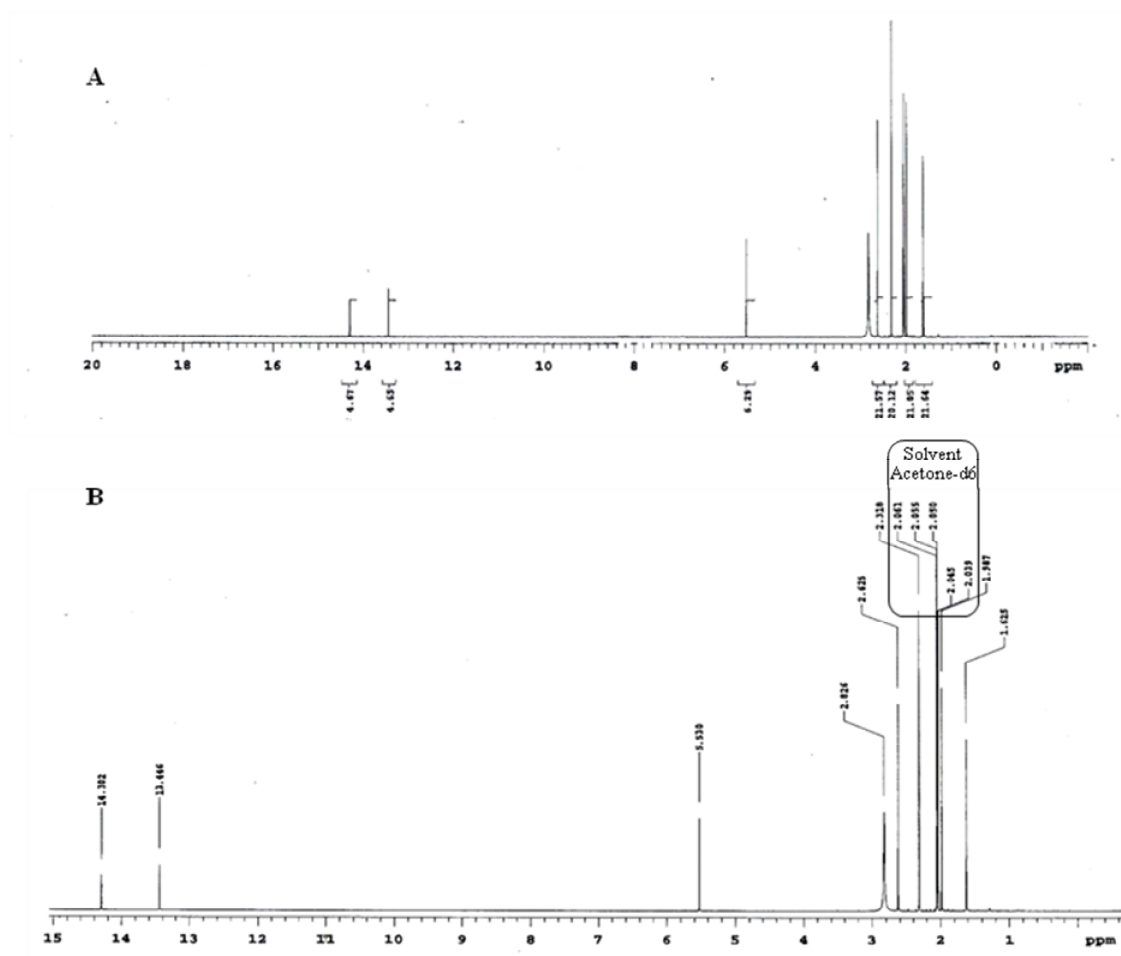

**Figure 4.** Spectroscopy of purified PS-UA. (A) integration of protons peaks area. (B) Chemical displacement of protons. The data are described as follows:  $^1\text{H}$ -NMR: (400 MHz, acetone-  $\text{d}_6$ )  $\delta_{\text{H}}$ : 1.62 (3H, s,  $\text{CH}_3$ -13), 1.98 (3H, s,  $\text{CH}_3$ -16), 2.62 (3H, s,  $\text{CH}_3$ -15), 2.82 (3H, s,  $\text{CH}_3$ -18); 5.53 (1H; s, C-4-H), 13.44 (1H; s, C-10-OH), 14.30 (1H; s, C-3-OH).

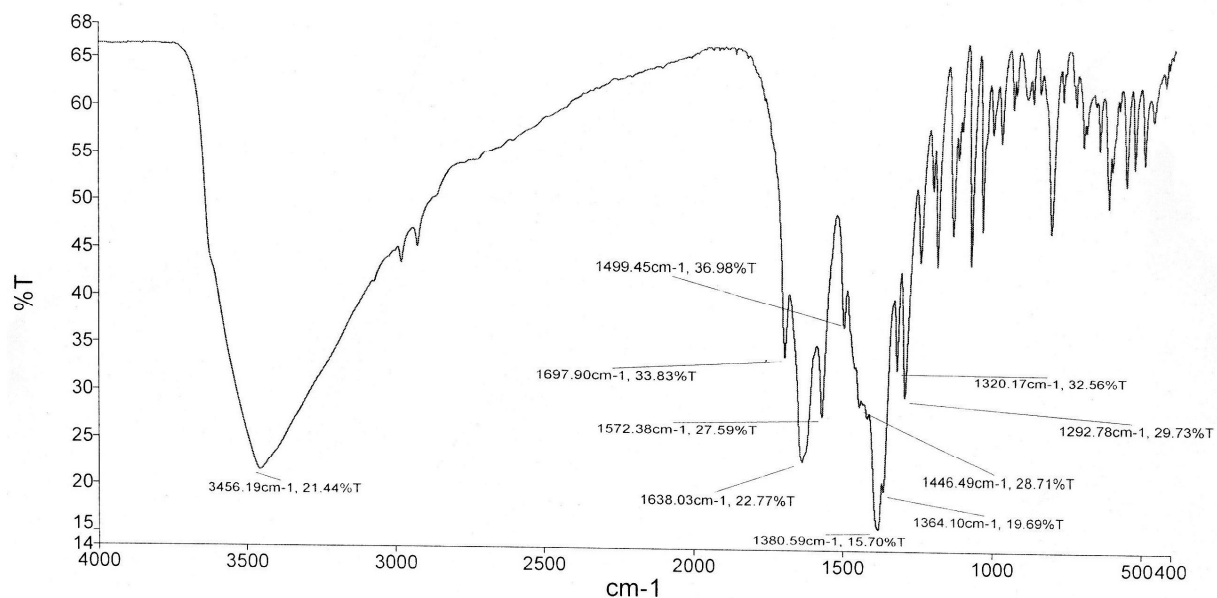

**Figure 5.** Spectroscopy of purified PS-UA. The spectrum corresponds to % of transmittance versus frequency of vibration. The data are described as follows: IR (KBr): 3456 ( $\nu$  C-OH), 3096 ( $\nu$  C-H Ar), 2989 ( $\nu_{as}$  CH<sub>3</sub>), 2929 ( $\nu_s$  CH<sub>3</sub>), 1697 ( $\nu$  C=O), 1638; 1572 ( $\nu$  C=C Ar), 1446 ( $\delta_{as}$  CH<sub>3</sub>), 1380 ( $\delta_s$  CH<sub>3</sub>), 1150 and approx. 1070 ( $\nu$  C-O-C) cm<sup>-1</sup>.

Elemental analysis: Found: C 51.49%; H 4.69%; N 0.08%; calculated for C<sub>18</sub>H<sub>16</sub>KO<sub>7</sub>·2H<sub>2</sub>O: C 51.54%; H 4.81%.
